# Supplementary material for: Template-derived carbon: an unexpected promoter for the creation of strong basicity on mesoporous silica
Source: Royal Society of Chemistry journal article supplement (doi:10.1039/c4cc04742g), 2014-07-31
Supplement: c4cc04742g1.pdf [file c4cc04742g1.pdf]

**Electronic Supplementary Information**

**Template-derived carbon: an unexpected promoter for the  
creation of strong basicity on mesoporous silica**

Lin-Bing Sun,\* Xiao-Yan Liu, Ai-Guo Li, Xiao-Dan Liu, and Xiao-Qin Liu

*State Key Laboratory of Materials-Oriented Chemical Engineering, College of Chemistry and  
Chemical Engineering, Nanjing Tech University, Nanjing 210009, China.*

\*Corresponding author. E-mail: lbsun@njtech.edu.cn.

## Experimental section

### Materials synthesis

**Synthesis of SBA-15.** Mesoporous silica SBA-15 was synthesized as follows. In a typical synthesis, 3 g of triblock copolymer P123 ( $\text{EO}_{20}\text{PO}_{70}\text{EO}_{20}$ ) was dissolved in 22.5 g of distilled water and 90 g of aqueous HCl solution ( $2 \text{ mol} \cdot \text{L}^{-1}$ ) with stirring at  $40^\circ\text{C}$ . After the formation of homogeneous solution, 6.38 g of tetraethylorthosilicate (TEOS) was added and stirred at this temperature for 24 h. Finally, the resulting gel was transferred to a Teflon-lined autoclave and kept at  $100^\circ\text{C}$  for 24 h under static condition. The precipitate of as-prepared SBA-15 products was filtered off and dried at the room temperature. The content of template in as-prepared SBA-15 is about 50 wt% according to thermogravimetric (TG) analysis. The removal of template was conducted by calcination at  $550^\circ\text{C}$  for 5 h in flowing air.

**Carbonization of template.** Carbon-containing samples were produced by thermal treatment of as-prepared SBA-15 under a nitrogen atmosphere at different temperatures ( $300$ ,  $500$ ,  $700$ , and  $900^\circ\text{C}$ ) for 3 h. The obtained grey samples were denoted as  $\text{T}_x\text{S}$ , where  $x$  is the treatment temperature. The grey color was caused by the formation of carbon layers on SBA-15, which is derived from the conversion of template.

**Introduction of lithium species.** The base precursor,  $\text{LiNO}_3$ , was introduced to the supports by wet impregnation. An identical amount of  $\text{LiNO}_3$  (20 wt%) was used for all samples. Typically, 0.2 g of  $\text{LiNO}_3$  was dissolved in 15 mL of deionized water, followed by addition of 0.8 g of support. After stirring at room temperature for 24 h, the mixture was evaporated at  $80^\circ\text{C}$  and subsequently dried at  $100^\circ\text{C}$  for 4 h. This leads to the formation of  $\text{LiNO}_3$ -modified samples, that is  $\text{LiNO}_3/\text{SBA-15}$  and  $\text{LiNO}_3/\text{T}_x\text{S}$ , where  $x$  is the carbonization temperature of template. Aiming to convert  $\text{LiNO}_3$  to basic sites,  $\text{LiNO}_3$ -modified samples were activated at  $400^\circ\text{C}$  in a  $\text{N}_2$  flow for 3 h, leading to the formation of  $\text{Li}_{400}\text{T}_x\text{S}$  when  $\text{T}_x\text{S}$  were used as supports. In a similar process,  $\text{LiNO}_3/\text{SBA-15}$  was activated at  $400$  or  $600^\circ\text{C}$ , resulting in the formation of  $\text{Li}_{400}\text{S}$  or  $\text{Li}_{600}\text{S}$ , respectively.

## Characterization

X-ray diffraction (XRD) patterns of samples were recorded using a Bruker D8 Advance diffractometer with Cu K $\alpha$  at 40 kV and 40 mA. Nitrogen adsorption-desorption isotherms were measured using an ASAP 2020 system at  $-196$  °C. The samples were degassed at 300 °C for 4 h prior to analysis. The Brunauer-Emmett-Teller (BET) surface area was calculated from the adsorption branch with the relative pressure ranging from 0.04 to 0.20. The pore diameter was calculated from the adsorption branch by using the Barrett-Joyner-Halenda (BJH) method. Transmission electron microscopy (TEM) images of the materials were captured in a JEM-2010 UHR electron microscope operated at 200 kV. Fourier transform infrared (IR) spectra of the samples diluted with KBr were performed on a Nicolet Nexus 470 spectrometer. The elemental analyses of samples were carried on an Elementar Vario MICRO CUBE (Germany).

To measure the amount of basic sites, 100 mg of sample after activation was added into 10 mL of aqueous HCl. The sample suspension was shaken for 24 h and the slurry was separated by a centrifuge. The remained acid in liquid phase was titrated with standard base where phenolphthalein was employed as an indicator. The amount of HCl consumed was used to calculate the basicity. Temperature programmed desorption of CO<sub>2</sub> (CO<sub>2</sub>-TPD) experiments were conducted on a BELSORP BEL-CAT-A apparatus. The sample was activated at 400 °C (or 600 °C) for 3 h prior to the adsorption of CO<sub>2</sub> at room temperature. After the physical adsorbed CO<sub>2</sub> was purged by a He flow (99.999%) at room temperature, the sample was heated to 800 °C and the CO<sub>2</sub> liberated was detected by a mass spectrometer (HAL201, HIDEN). TG analysis was performed on a thermobalance (STA-499C, NETZSCH). About 10 mg of sample was heated from the room temperature to 800 °C in a flow of N<sub>2</sub>. The gaseous products derived from LiNO<sub>3</sub> decomposition was also monitored by the mass spectrometer (MS).

## Catalytic test

Dimethyl carbonate (DMC) was synthesized from the transesterification of ethylene carbonate and methanol. In a typical process, methanol (0.5 mol, 16 g), ethylene carbonate (0.1

mol, 8.8 g), and catalyst (0.5 wt% of methanol) were added to a three-necked glass flask with a water-cooled condenser. All the catalysts were activated at 400 °C (or 600 °C) in a N<sub>2</sub> flow for 3 h prior to reaction. The reaction was conducted at 65 °C with stirring for a given period of time. After the reaction was completed, the reaction mixtures were recovered from the flask and subjected to centrifuging. The obtained upper liquid was then analyzed by a Varian 3800 gas chromatography (GC) equipped with a flame ionization detector (FID).

**Additional results and discussion** To examine the mechanism for the conversion of LiNO<sub>3</sub> with the assistance of carbon, LiNO<sub>3</sub> was loaded on pure carbon. The decomposition behavior was studied and the results were shown in Fig. S15. The decomposition of LiNO<sub>3</sub> on carbon takes place at about 320 °C, which is analogous to that on the carbon-coated SBA-15 (T<sub>500S</sub>). Moreover, two main MS signals of  $m/z = 30$  and 44 originated from NO and CO<sub>2</sub> were observed. This suggests an identical pathway for the conversion of LiNO<sub>3</sub> supported on carbon.

**Table S1** Carbon contents and textual parameters of different samples.

| Sample              | Carbon content<br>(wt%) | $S_{\text{BET}}$<br>( $\text{m}^2 \cdot \text{g}^{-1}$ ) | $V_{\text{p}}$<br>( $\text{cm}^3 \cdot \text{g}^{-1}$ ) | $D_{\text{p}}$<br>(nm) |
|---------------------|-------------------------|----------------------------------------------------------|---------------------------------------------------------|------------------------|
| SBA-15 <sup>a</sup> | 0.1                     | 717                                                      | 1.11                                                    | 8.1                    |
| T <sub>300</sub> S  | 6.7                     | 797                                                      | 1.11                                                    | 9.2                    |
| T <sub>500</sub> S  | 4.0                     | 757                                                      | 1.01                                                    | 8.1                    |
| T <sub>700</sub> S  | 3.3                     | 698                                                      | 1.01                                                    | 8.1                    |
| T <sub>900</sub> S  | 1.8                     | 618                                                      | 0.90                                                    | 7.1                    |

<sup>a</sup> The carbon content of template-containing SBA-15 is 28.3 wt%.

**Table S2** Textual parameters of different samples.

| Sample                               | $S_{\text{BET}}$<br>( $\text{m}^2 \cdot \text{g}^{-1}$ ) | $V_{\text{p}}$<br>( $\text{cm}^3 \cdot \text{g}^{-1}$ ) | $D_{\text{p}}$<br>(nm) |
|--------------------------------------|----------------------------------------------------------|---------------------------------------------------------|------------------------|
| Li <sub>400</sub> S                  | 364                                                      | 0.64                                                    | 7.1                    |
| Li <sub>400</sub> T <sub>300</sub> S | 340                                                      | 0.58                                                    | 7.1                    |
| Li <sub>400</sub> T <sub>500</sub> S | 305                                                      | 0.54                                                    | 7.1                    |
| Li <sub>400</sub> T <sub>700</sub> S | 301                                                      | 0.57                                                    | 7.1                    |
| Li <sub>400</sub> T <sub>900</sub> S | 280                                                      | 0.62                                                    | 7.1                    |
| Li <sub>600</sub> S                  | 17                                                       | 0.11                                                    | —                      |

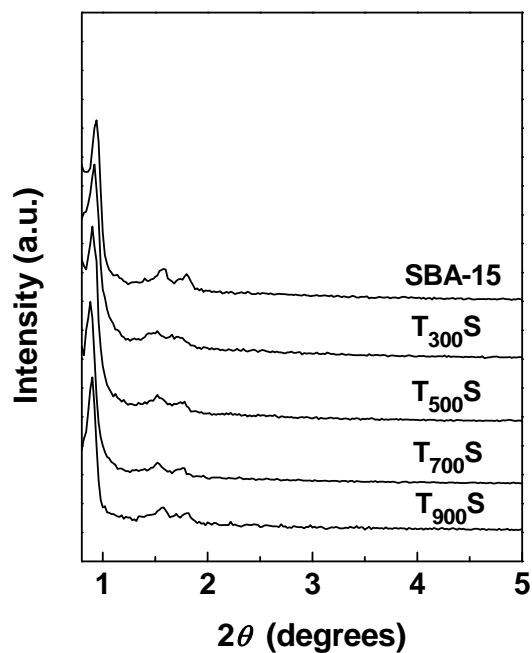

**Fig. S1** Low-angle XRD patterns of SBA-15 and template-containing SBA-15 treated at different temperatures.

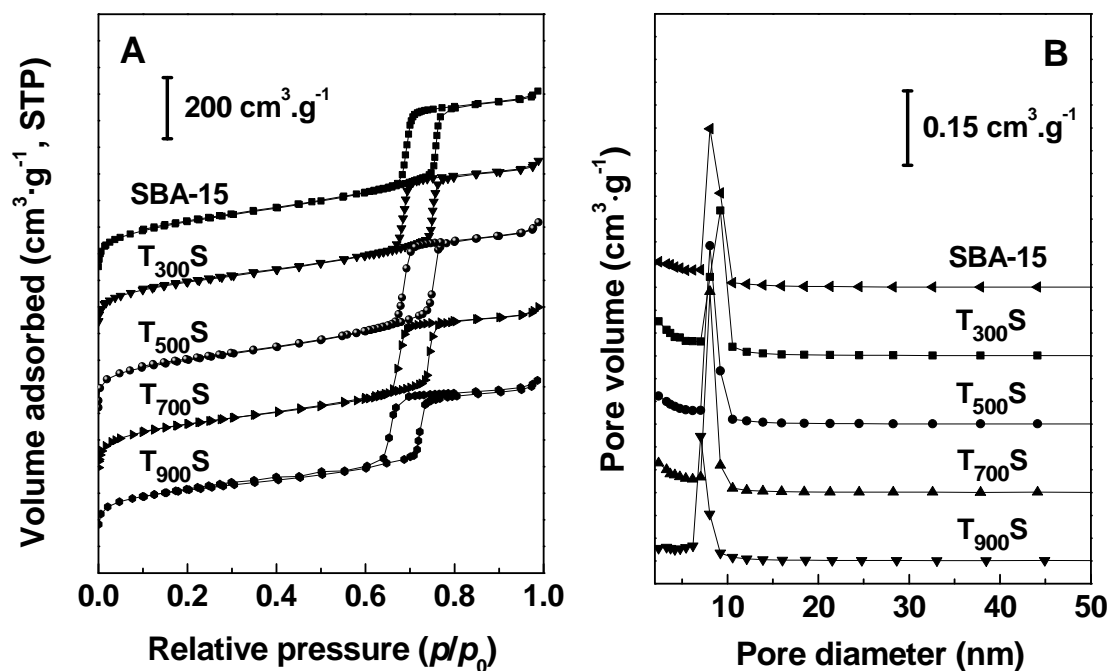

**Fig. S2** (A) N<sub>2</sub> adsorption-desorption isotherms and (B) pore size distributions of template-free SBA-15 and template-containing SBA-15 treated at different temperatures. Curves are plotted offset for clarity.

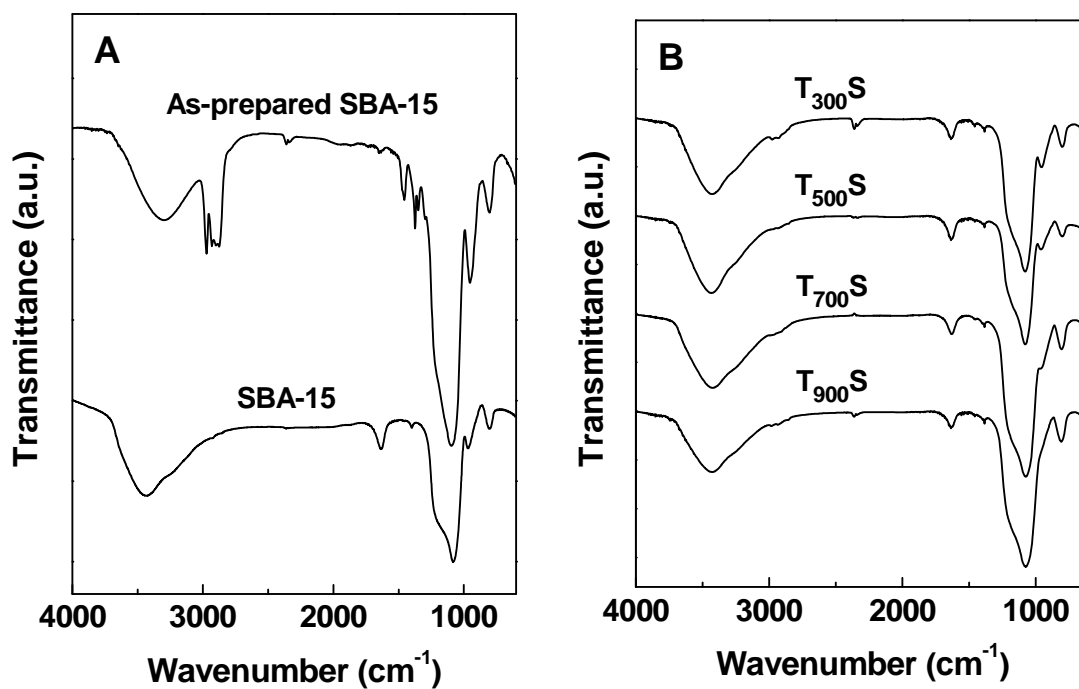

**Fig. S3** IR spectra of (A) template-containing and template-free SBA-15 as well as (B) template-containing SBA-15 treated at different temperatures.

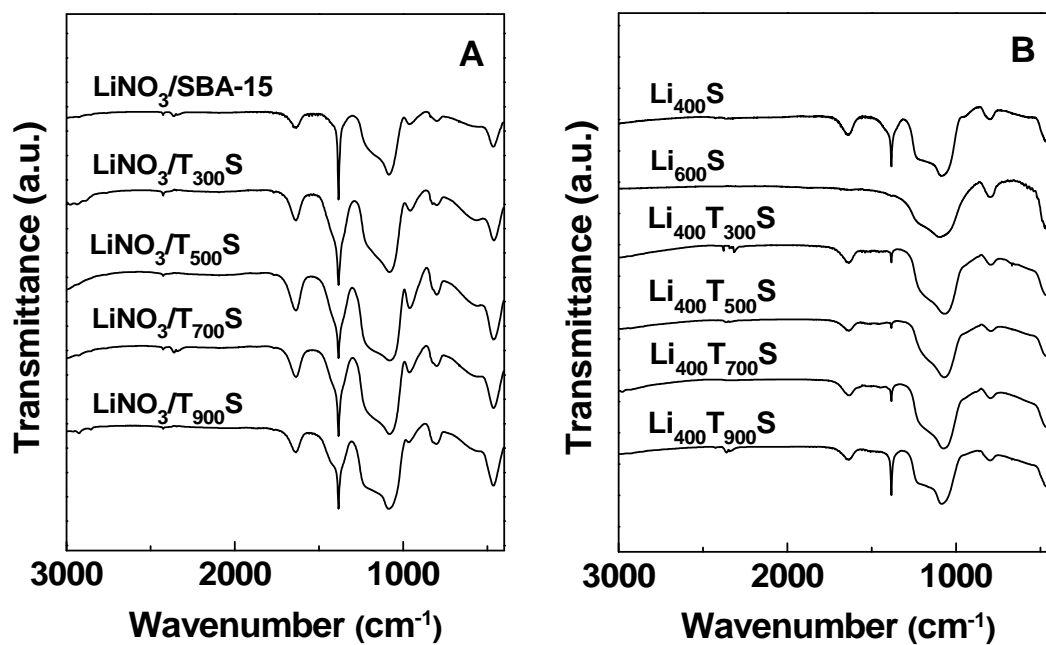

**Fig. S4** IR spectra of  $\text{LiNO}_3$ -modified samples (A) before and (B) after activation.

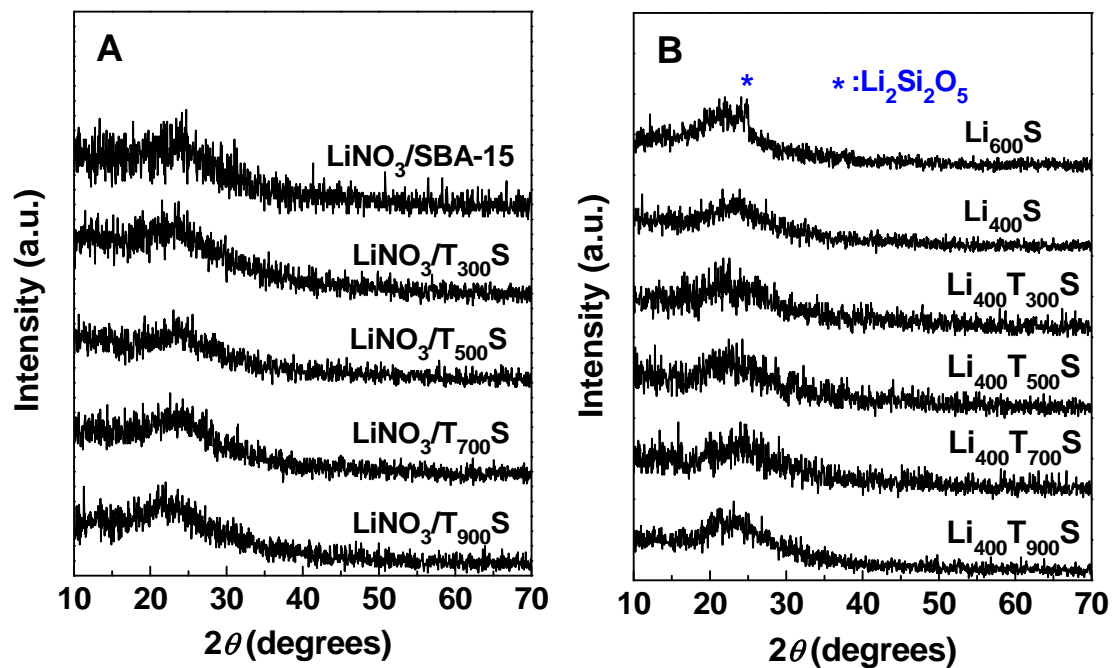

**Fig. S5** Wide-angle XRD patterns of  $\text{LiNO}_3$ -modified samples before and after activation.

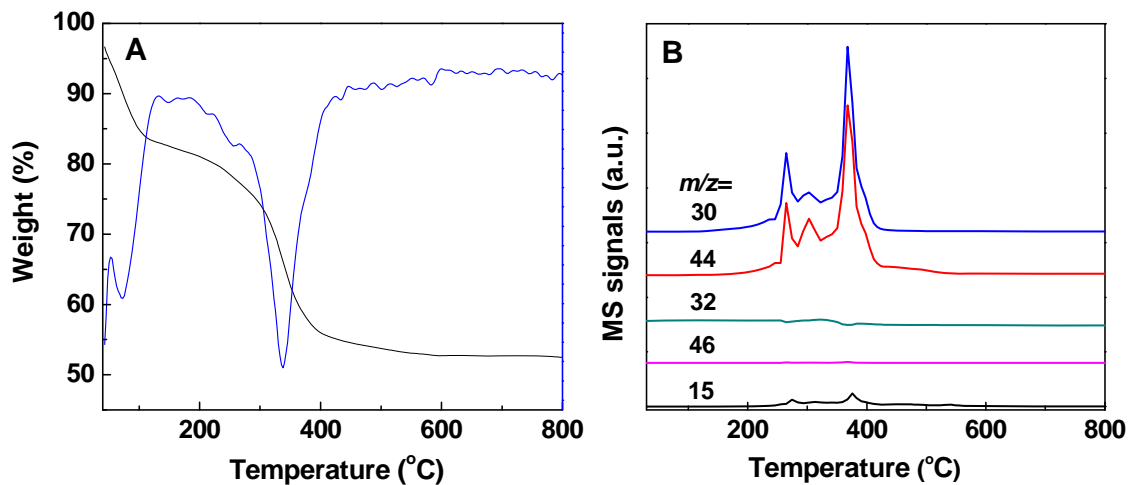

**Fig. S6** (A) TG and DTG curves as well as (B) MS signals of gaseous products from the decomposition of  $\text{LiNO}_3$  supported on  $\text{T}_{300}\text{S}$ .



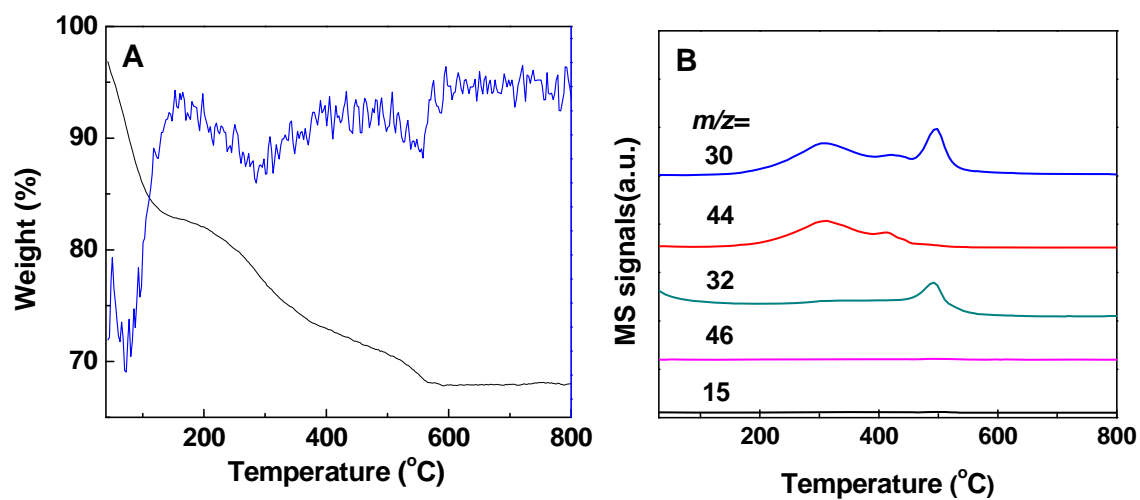

**Fig. S7** (A) TG and DTG curves as well as (B) MS signals of gaseous products from the decomposition of  $\text{LiNO}_3$  supported on  $\text{T}_{700}\text{S}$ .

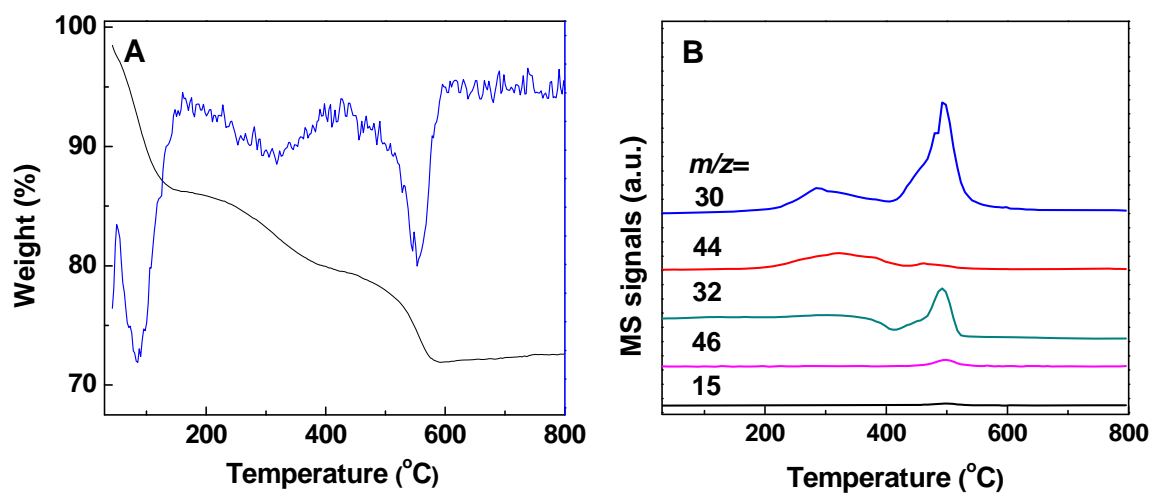

**Fig. S8** (A) TG and DTG curves as well as (B) MS signals of gaseous products from the decomposition of  $\text{LiNO}_3$  supported on  $\text{T}_{900}\text{S}$ .

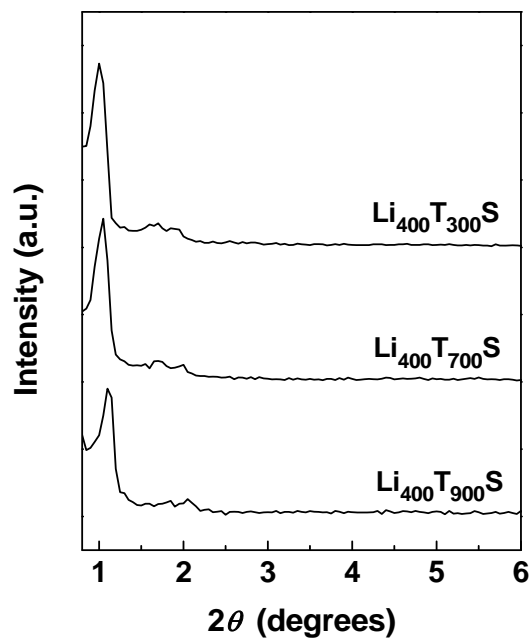

**Fig. S9** Low-angle XRD patterns of Li-containing samples.

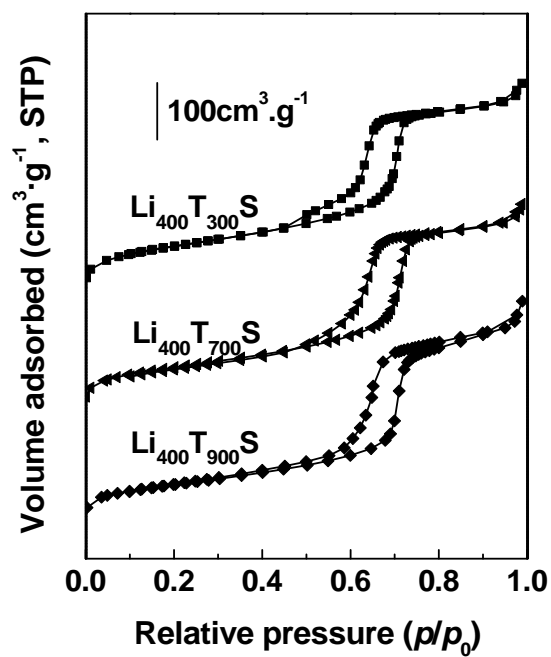

**Fig. S10**  $\text{N}_2$  adsorption-desorption isotherms of Li-containing samples. Curves are plotted offset for clarity.

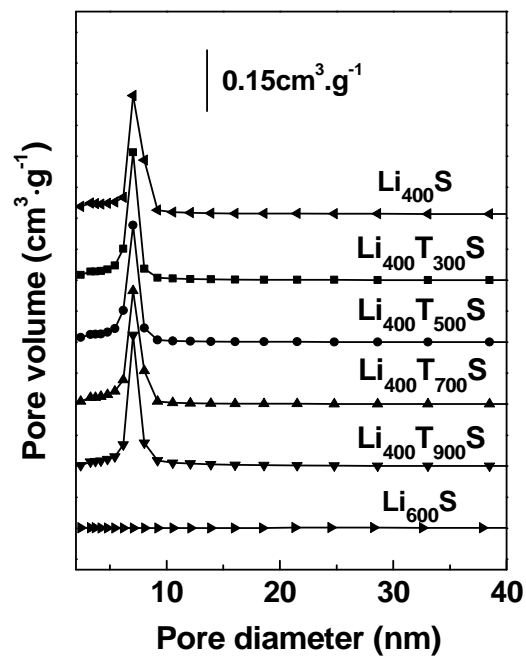

**Fig. S11** Pore size distributions of Li-containing samples. Curves are plotted offset for clarity.

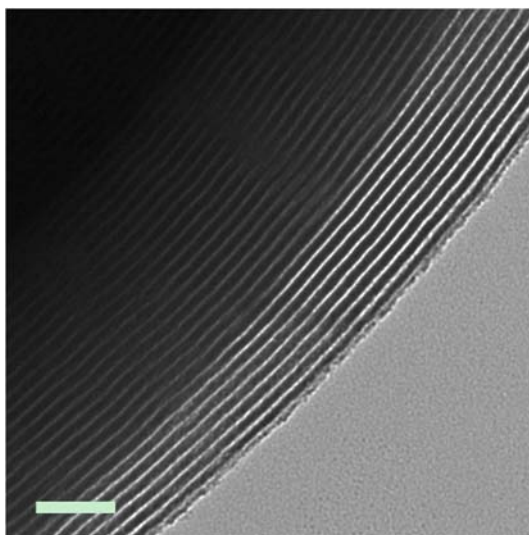

**Fig. S12** A TEM image of the sample  $\text{Li}_{400}\text{T}_{500}\text{S}$ . The scale bar represents 50 nm.

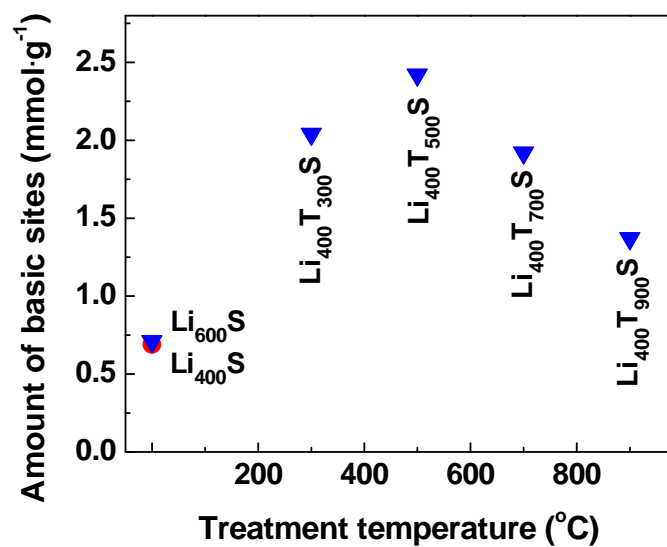

**Fig. S13** Amount of basic sites as a function of treatment temperatures used in the carbonization of template.

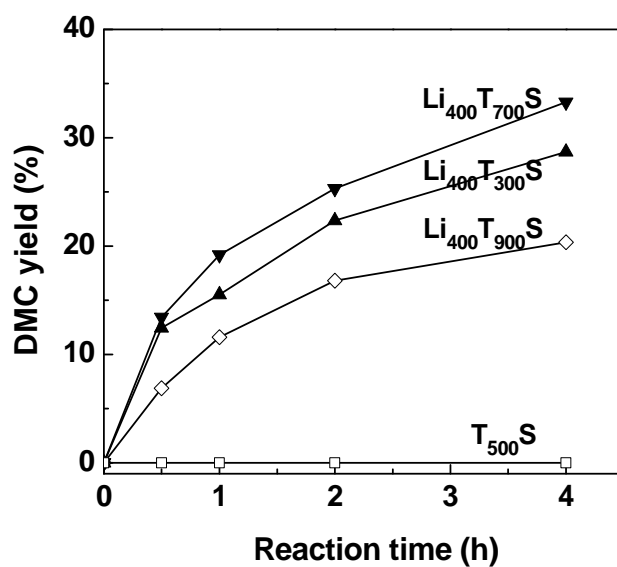

**Fig. S14** The yield of DMC under the catalysis of different samples.

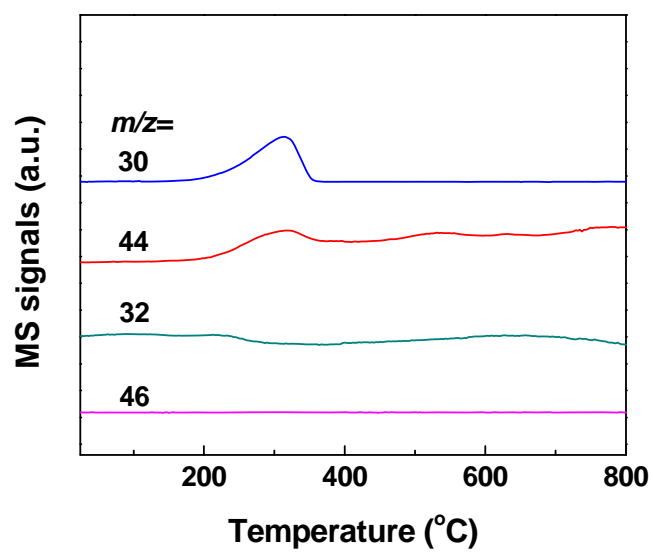

**Fig. S15** MS signals of gaseous products from the decomposition of LiNO<sub>3</sub> supported on carbon.
